# Supplementary material
Source: Elsevier journal article supplement (https://www.sciencedirect.com/science/article/pii/S0213911119300858)
Supplement: mmc1 [file S0213911119300858:mmc1.docx]

**Apéndice**

**Talleres de investigación-aprendizaje realizados durante las diferentes fases del estudio**

**Primer taller. Diseño del estudio *Evaluación de la experiencia Ttipi-Ttapa en la Comarca de Salud Pública Tolosa-Goierri.* Octubre 2016**

1. Justificación y marcos teóricos

- Experiencia Ttipi-Ttapa Tolosa-Goierri / pertinencia de su evaluación
- Marcos teóricos y metodológicos de partida. Bibliografía de consulta
  - Promoción de la salud / ejercicio físico / poblaciones y subpoblaciones
  - Salud comunitaria / enfoque integral y participativo
  - Metodologías de investigación epidemiológico-estadísticas / cualitativas / mixtas / evaluativas / participativas / investigación-acción

1. Esquema-resumen inicial
   1. Objetivos
   2. Métodos y participantes
   3. Descripción del proceso y su evolución
   4. Variables cuantificables
      1. Información disponible
      2. Nuevos datos a conseguir
   5. Metodología cualitativa
      1. Generación de información mediante grupos focales y entrevistas individuales
      2. Muestreo intencionado en la selección de participantes. Criterios a tener en cuenta
      3. Convocatoria, lugar y desarrollo favorables a la participación
      4. Modelo de análisis temático abierto al conjunto de los textos y al contexto
      5. Validación del proceso. Procedimientos a seguir
      6. Compromisos éticos reales y formales (consentimiento informado, comité de ética)
2. Dinámicas, compromisos y relaciones del equipo en el trabajo de investigación-aprendizaje
3. Cronograma y distribución de tareas

**Segundo taller. Metodologías, métodos y técnicas para la obtención de información. Noviembre 2016**

1. Repaso de los objetivos y diseño del proyecto. Metodología mixta. Enfoque participativo
2. Selección y ordenación de las informaciones relativas a la descripción del proceso
3. Información cuantificable (componente complementario)
   - Registros de actividades
   - Obtención de información mediante encuesta
   - Antecedentes y resultados de encuestas locales previas
   - Aspectos generales a tener en cuenta en los cuestionarios
   - Formato a utilizar, cómo, dónde y cuándo
4. Métodos y técnicas cualitativas (componente principal)
   - Bases metodológicas
   - Recomendaciones particulares en la realización de grupos y entrevistas
   - Formatos y utilización de los guiones semiestructurados
5. Calidad y compromisos éticos en el proceso de obtención de información
6. Revisión de tareas y cronograma

**Tercer taller. Seguimiento y concreción de actividades. Enero 2017**

1. Repaso breve de los objetivos y diseño del proyecto
2. Consentimientos informados y solicitud al CEIC
3. Realización de la encuesta
   1. Formato, contenido y variables a analizar
   2. Plan de distribución, recogida y análisis
4. Realización de grupos focales y entrevistas individuales
   1. Contactos y convocatorias a los participantes. Información, voluntariedad y respeto
   2. Realización de grupos y entrevistas individuales. Guía de apoyo. Interacción entrevistadoras–participantes. Recepción, agradecimientos, despedida abierta
   3. Grabación, consentimiento y transcripciones
   4. Notas de campo
5. Repaso de cronograma y distribución de tareas

**Cuarto taller. Revisión de la información recogida y trabajo de análisis. Junio 2017**

1. Repaso breve de los objetivos y diseño del proyecto
2. Estado actual de la obtención de información narrativa, cuantitativa y cualitativa
3. Análisis descriptivo de los datos cuantitativos. Validez, análisis y test estadísticos
4. Métodos y técnicas en el análisis cualitativo
   - Repaso de los aspectos principales del análisis cualitativo
     - El trabajo de análisis y el proceso de investigación
     - Modelos, opciones y retos
     - Calidad en el trabajo de análisis
   - El modelo y proceso de análisis en nuestra investigación: posibilidades y retos del análisis temático
     - Lecturas, relecturas, categorías y mapas
     - Temas, subtemas y nuevos mapas
     - La posible utilización de CAQDAS. El programa MaxQDA
     - El trabajo de redacción
5. Revisión de tareas pendientes y cronograma

**Quinto taller. Avances en el análisis cualitativo. Septiembre 2017**

1. Repaso del proceso de la investigación y del modelo de análisis
   - Objetivos y diseño
   - Análisis temático y apertura del modelo. Consistencia/descubrimiento
2. Revisión de los textos
   - Grupos
   - Entrevistas individuales
   - Identificación de primeras categorías, mapas y conjeturas analíticas
   - Comparación y contraste repetido con los textos
   - Utilización del programa MaxQDA
3. Revisión de los criterios de calidad y procedimientos de validación
   - Aportaciones y puesta en común
4. Pasos a dar para la finalización del trabajo de análisis y su redacción

**Sexto taller. Avances y discusión de los resultados en el equipo. Febrero 2018**

1. Repaso de objetivos y metodología del estudio
2. Revisión de los tres componentes
   - - Descripción evolutiva de la experiencia
     - Variables cuantificables del proceso
     - Metodología cualitativa
3. Avance de resultados del análisis cualitativo
   - - Aportaciones del programa MaxQDA
     - Mapas conceptuales, temas y subtemas según informantes
     - Avances de posibles ejes transversales de análisis y discusión
4. Calidad del proceso de análisis. Triangulación en el equipo y búsqueda de casos negativos (interpretaciones alternativas)
5. Tareas de redacción

**Séptimo taller. Borrador de informe amplio y difusión de resultados. Junio 2018**

- 1. Estructura y contenidos provisionales del informe. Discusión en el equipo
     - Introducción / Descripción de la experiencia / Justificación de la investigación evaluativa
     - Objetivos
     - Metodología, métodos y participantes
     - Resultados
       - Análisis descriptivo de los datos de la encuesta
       - Temas, subtemas, categorías y mapas de interrelaciones según ámbitos de informantes y síntesis trasversales
     - Discusión
     - Conclusiones y recomendaciones
     - Limitaciones y posibles investigaciones futuras
  2. Tareas y formatos de escritura y difusión del estudio
     - Presentación, contraste y devolución a los participantes
     - Comunicaciones en congresos, jornadas y reuniones científicas
     - Publicación de posibles artículos
     - Autorías
  3. Distribución de tareas pendientes

**Octavo taller. Escritura y difusión del estudio. Septiembre 2018**

- - 1. Información y discusión de las presentaciones como comunicaciones
    2. Programación de reuniones con participantes
    3. Avances en la escritura del informe amplio
    4. Elaboración de un primer artículo para su publicación. Contenidos, audiencias y revistas
    5. Valoraciones de la experiencia de investigación-aprendizaje por el equipo
    6. Distribución de tareas y plazos. Futuras reuniones en diciembre de 2018 y febrero de 2019
